1

2

3 **Body size mediates latitudinal population differences in response to *Bd* infection in two**  
4 **amphibian species.**

5

6

7 Sara Meurling<sup>1\*</sup>, Maria Cortazar-Chinarro<sup>1,4,5</sup>, Mattias Siljestam<sup>1</sup>, David Åhlen<sup>2</sup>, Erik Ågren<sup>3</sup>,  
8 Jacob Höglund<sup>1</sup> and Anssi Laurila<sup>1</sup>

9

10 <sup>1</sup>Animal Ecology/ Department of Ecology and Genetics, Uppsala University, Sweden

11 <sup>2</sup>Department of Ecology, Environment and Plant Sciences, Stockholm University, Sweden

12 <sup>3</sup>Department of Pathology and Wildlife Diseases, National Veterinary Institute, Uppsala,  
13 Sweden

14 <sup>4</sup>MEMEG/Department of Biology, Lund University, Lund, Sweden

15 <sup>5</sup>Department of Earth, Ocean and Atmospheric Sciences, University of British Columbia,  
16 Vancouver, Canada

17

18 \*Corresponding author: [anssi.laurila@ebc.uu.se](mailto:anssi.laurila@ebc.uu.se)

19 **Abstract**

20 Populations of the same species may differ in their sensitivity to pathogens but the factors  
21 behind this variation are poorly understood. Moreover, infections may cause sub-lethal fitness  
22 effects even in species resistant or tolerant to disease. The chytrid fungus *Batrachochytrium*  
23 *dendrobatidis* (*Bd*), is a generalist pathogen which has caused amphibian population declines  
24 worldwide. In many species, *Bd* infection causes the disease chytridiomycosis, often leading  
25 to high mortality. We investigated how geographical origin affects tolerance to *Bd* by  
26 exposing newly metamorphosed individuals of two North European amphibians (moor frog  
27 *Rana arvalis*, common toad *Bufo bufo*) from two latitudinal regions to two different *Bd*GPL  
28 strains. *Bd* exposure strongly lowered survival in *B. bufo*, and in both species survival was  
29 lower in the northern region, this difference being much stronger in *B. bufo*. Northern  
30 individuals were smaller in both species, and the survival difference between the regions was  
31 size-mediated with smaller individuals being more sensitive to *Bd*. In both species, *Bd*  
32 exposure led to sub-lethal effects in terms of reduced growth suggesting that even individuals  
33 surviving the infection may have reduced fitness mediated by smaller body size. *Bd* strain  
34 affected size-dependent mortality differently in the two regions. We discuss the possible  
35 mechanisms how body size and geographical origin can contribute to the present results.

36

37

38

39

## 40 **Introduction**

41 Natural populations are increasingly affected by emerging infectious diseases (Daszak et al.  
42 2000, Pennisi 2010, Fisher et al. 2012, Scheele et al. 2019). Many of the emerging diseases  
43 are caused by generalist and opportunistic fungal pathogens which can infect a wide range of  
44 host species (Wibbelt et al. 2010, Fisher et al. 2012, Lorch et al. 2016, More et al. 2018). The  
45 virulence of a fungal pathogen often differs among host species, leading to population  
46 declines in some hosts while having no apparent effect on others (Casadevall 2007, Herceg et  
47 al. 2021). There is also evidence that populations of a host species may differ in their  
48 susceptibility, but apart from plant systems few studies have addressed this question in detail  
49 (Ebert 2008; Laine et al. 2011; Bradley et al. 2015; Martin-Torrijos et al. 2017).

50 The chytrid fungus *Batrachochytrium dendrobatidis* (*Bd*), causing the disease  
51 chytridiomycosis in amphibians, is a generalist pathogen which has caused the decline of over  
52 500 amphibian species, including the presumed extinction of 90 species (Berger et al. 1998,  
53 Skerratt et al. 2007, Lips 2016, Scheele et al. 2019). *Bd* is endemic in East Asia where  
54 it coexists with the native fauna, but severe outbreaks of chytridiomycosis have been observed  
55 in the Americas and Australia (Lips 2016, Scheele et al. 2019). There is considerable variation  
56 in virulence among genetic strains of *Bd* (Farrer et al. 2011, Bataille et al. 2013, Greenspan et  
57 al. 2018) and *BdGPL*, the global panzootic lineage originating in Eastern Asia, has caused  
58 most of the chytridiomycosis outbreaks (O’Hanlon et al. 2018). While genetic variation  
59 within *BdGPL* is relatively limited (O’Hanlon et al. 2018), there is evidence for virulence  
60 differences between *BdGPL* strains (Becker et al. 2017; Burrow et al. 2017, Dang et al 2017).

61 As a generalist pathogen, *Bd* infects a wide range of amphibian species (Fisher et al. 2012,  
62 Olson et al. 2013). However, all species do not develop chytridiomycosis; many are resistant  
63 to the disease and can clear the infection, while others can tolerate high infection loads  
64 without developing the disease (Fisher et al. 2009, Gahl et al. 2012, Ellison et al. 2014,

65 Scheele et al. 2017). Similarly, geographical populations of the same species can differ in  
66 their susceptibility to *Bd* (Savage and Zamudio 2011, Bradley et al. 2015, Kosch et al. 2019).  
67 These differences can be due to genetic differences in traits like immune response and  
68 behavior (Richards-Zawacki 2010), and are in some cases linked with direct *Bd*-mediated  
69 selection (Savage & Zamudio 2016, Savage et al. 2018). Although infection does not cause  
70 direct mortality in the resistant and tolerant species, sub-lethal fitness effects such as  
71 decreased growth have been detected (Bielby et al. 2015, Burrow et al. 2017, Campbell et al.  
72 2019).

73 Climate-related latitudinal divergence is an important structuring force of intraspecific genetic  
74 variation (e.g., Hewitt 2000, Conover et al. 2009), but its potential effects mediating host-  
75 pathogen interactions have received little attention. Two lines of evidence suggest that  
76 amphibian populations living at high latitudes in the northern hemisphere may be especially  
77 vulnerable to disease. Firstly, due to post-glacial colonization patterns northern populations  
78 often harbor less genetic variation (Hewitt 2000). In many amphibians, this is true also for  
79 immunogenetic variation in major histocompatibility (MHC) genes (Zeisset and Beebee 2014,  
80 Cortázar-Chinarro et al. 2017), which is associated with *Bd* resistance (Savage and Zamudio  
81 2011, Savage et al. 2018, Kosch et al. 2019). Furthermore, pathogen richness and abundance  
82 are significant predictors of adaptive MHC variation (Wang et al. 2017). As pathogen richness  
83 and abundance decrease towards colder climates (Schemske et al. 2009), populations at higher  
84 latitudes may encounter lower diversity and a lower number number of pathogens which may  
85 lead to increased drift and loss of adaptive immunogenetic variation in these populations  
86 (Cortázar-Chinarro et al. 2017). Secondly, time-constrained high-latitude environments select  
87 for high larval growth and development rates (Palo et al. 2003, Luquet et al. 2019), which in  
88 amphibians can trade-off with disease resistance (Johnson et al. 2011, Woodhams et al. 2016)  
89 and immune response (Gervasi and Foufopoulos 2007, Murillo-Rincon et al. 2017). While all

90 these factors may contribute to lower ability to withstand novel pathogens in high-latitude  
91 populations, no studies on disease resistance between latitudinal populations have been made.  
92 Here we conducted a laboratory common garden experiment to examine inter- and  
93 intraspecific population differences in response to *Bd* infection. Our aims were three-fold: 1)  
94 to investigate the response of two common north European amphibians (moor frog *Rana*  
95 *arvalis* and common toad *Bufo bufo*) to *Bd* infection, 2) investigate if the responses differ  
96 between southern and northern Scandinavian populations of these species and 3) evaluate if  
97 these responses differ between two geographically separated *Bd* lineages. To this end, we  
98 infected newly metamorphosed amphibians with two different *Bd*GPL lineages and measured  
99 their survival and growth during a 30-day exposure period.

100

## 101 **Methods**

### 102 *Animal rearing*

103 Both *R. arvalis* (hereafter *Ra*) and *B. bufo* (hereafter *Bb*) are widespread amphibians in  
104 Europe occurring up to the polar circle in the north (Sillero et al. 2014). Both species are  
105 explosive breeders and mate in early spring. In southern Sweden, *Bd* prevalence in breeding  
106 adults is 15.3% (n = 288) and 3.4% (n = 941) in *Ra* and *Bb*, respectively (Meurling et al.  
107 2020).

108 Eggs of both species were collected in April 2016 at two sites in Skåne county in  
109 southernmost Sweden and May 2016 at two sites in in Norrbotten county in northern Sweden  
110 (Fig. 1; Table S1). We collected approximately ten eggs from each of ten different clutches at  
111 each site. The eggs and tadpoles were reared in walk-in climate-controlled rooms at Uppsala  
112 University in plastic tanks filled with 20l reconstituted soft water (RSW; NaHCO<sub>3</sub>, CaSO<sub>4</sub>,  
113 MgSO<sub>4</sub> and KCl added to deionized water; APHA 1985) until metamorphosis. Each clutch

114 was kept in a separate tank under 18:6 h light/dark regime at 19°C. The tadpoles were fed *ad*  
115 *libitum* spinach and fish flakes and water was changed every third day. At metamorphic  
116 climax (stage 42; Gosner 1960), the animals were moved to another tank of the same size with  
117 access to aquatic and terrestrial (aquarium sand) habitat and a shelter. Four days after  
118 completion of tail absorption (stage 46), the animals were transported to the sealed  
119 experimental facilities at the Swedish Institute for Veterinary Science, Uppsala, where they  
120 were kept individually in 1.2 l plastic tanks lined with moist paper towels and a lid of a plastic  
121 bottle as a shelter. The metamorphs were kept in these tanks until the end of the experiment  
122 and fed fruit flies and crickets *ad libitum* under 18/6h light/dark regime at 19°C. The  
123 condition of each animal was checked daily and the tanks were cleaned every third day.

#### 124 *Infection experiment*

125 The infection treatments were conducted after one week of acclimatization at the  
126 experimental facility. The experimental animals were exposed to one of two isolates of *Bd*-  
127 GPL (SWE or UK) or a sham infection consisting of culture medium (Table 1). The UK  
128 isolate (UKMal 01) was isolated from a wild alpine newt (*Ichthyosaura alpestris*) in the UK  
129 in 2008. The Swedish isolate (SWED-40-5) originated from a wild green toad (*Bufo*  
130 *viridis*) in Malmö municipality in southern Sweden in 2015. The animals were exposed  
131 individually for 5 h to 200µl culture media containing a dosage of 60 000 zoospores from one  
132 of the *Bd* strains in 30 ml of RSW. The control group (C) was exposed for 5 h to an  
133 equivalent volume of RSW and culture media without *Bd* spores. Altogether, we treated 74  
134 (25 in SWE, 24 in UK and 25 in C treatment) southern and 46 (16 SWE, 14 UK, 16 C)  
135 northern *Ra*. The corresponding numbers for *Bb* were 64 (21, 19, 24) southern and 90 (31, 31,  
136 28) northern individuals.

137 After exposure the animals were monitored for 30 days, or until death. Animals showing  
138 irreversible signs of chytridiomycosis (loss of righting function) were euthanized with an  
139 overdose of MS222. Body mass of the animals was measured at the start and end of the  
140 experiment (or at death). At the end of the experiment, the surviving animals were euthanized  
141 and stored in 96% ethanol at 4 °C.

#### 142 *DNA extraction and qPCR analyses*

143 To confirm infection status, we assessed the presence of *Bd* by using qPCR. DNA was  
144 extracted from a hind leg using a Prepman Ultra method described in Boyle et al. (2004).  
145 Presence of *Bd* was assessed by amplifying the internal transcribed spacer (ITS)-5.8S rRNA  
146 region (Boyle et al 2004). 25µl reactions containing 12.5µl 2X Taqman Master Mix (Applied  
147 Biosystem, ref. 4318157), 2.25 µl 10µM each of forward and reverse primers, 0.625 µl 10µM  
148 MGB probe and 5µl of DNA (diluted x10 in water) were run. Each sample was run in  
149 triplicate. An exogenous internal positive control (IPC; (Hyatt et al. 2007)) was added to one  
150 well in each triplicate (1µl 10XExo IPC master mix and 0.5µl 50XExo IPC DNA to each  
151 sample) (VICTIM dye, Applied Biosystems ref. 4304662) to avoid false negatives due to  
152 inhibitors. The qPCR assays were run on a Biorad CFX96 Real Time System machine using  
153 amplification conditions described in Boyle et al. (2004) with standards of 0.1, 1, 10 and 100  
154 genomic equivalents (GE). An individual was recorded as positive if at least one of the  
155 triplicate samples exhibited a positive signal (i.e. an exponential amplification curve). If the  
156 IPC showed signs of inhibition, negative samples were rerun once before the samples were  
157 assigned as not scoreable (NA) and removed from the data set. The above-mentioned  
158 standards were used to create a standard curve which was then used to calculate the infection  
159 intensity for each individual expressed in genome equivalents (GE).

160 For the statistical analysis of the infection, we used the logarithm (base 10, zero values were  
161 replaced by 0.001, one tenth of the lowest measured non-zero value) of GE and refer to this as  
162 infection load (IL).

### 163 *Statistical analyses*

164 All analyses were conducted in R 3.5.2 (R Core Team 2018). Survival was analysed using  
165 Generalised Linear Models with a binomial error distribution and a logit link function while  
166 data on growth and IL were analysed using linear models. The model assumptions of the  
167 linear models were checked using the model diagnostic plots in R. In *Bb*, the growth data  
168 were log-transformed due to heteroscedasticity. Consequently, growth in was defined as  
169 proportional growth per day:  $\log(\text{mass at death} / \text{mass at exposure}) / \text{lifespan}$  for both species.

170 The models that best explained differences in IL, survival and growth were selected using  
171 bidirectional elimination (*stepAIC* function in R package *MASS*) starting from the full model  
172 with Response ~ Region + *Bd*-strain + Size at infection + Infection load + Interactions. For  
173 IL, the full model was IL ~ Region + *Bd*-strain + Size at infection + Interactions. The two  
174 populations within each region were pooled in the analyses as our interest was increasing the  
175 sampled genetic variation within each region rather than studying population differences, and  
176 our experimental design did not allow for effective tests of population effects.

177 To separate the effect of each *Bd*-treatment we also ran the models without the control  
178 treatment following the same general structure. Differences in size at infection between  
179 regions and treatment were analysed with factorial ANOVAs. This was also done for  
180 differences in IL between the species.

181

## 182 **Results**



183 The qPCR analyses showed high infection success: only two of the successfully analysed  
184 individuals from the exposed groups were negative to *Bd* infection at the end of the  
185 experiment (one *Bb* and one *Ra*; Table 1) and were removed from the analyses. Thirteen  
186 control individuals were also found *Bd* positive (Table 1). However, the infection intensity  
187 was very low and we find it likely that these samples were contaminated during sample  
188 processing at the end of the experiment. For the statistical analysis, their infection intensity  
189 was therefore considered to be 0 GE.

190 At the start of the experiment, northern animals were significantly smaller than southern  
191 animals both in *Ra* ( $F_{1, 115} = 25.05$ ,  $p < 0.001$ ) and in *Bb* ( $F_{1, 149} = 156.94$   $p < 0.001$ ; Fig. 2).  
192 There was no difference in size at exposure between treatments (*Ra*:  $F_{2, 115} = 0.15$ ,  $p = 0.86$ ,  
193 *Bb*:  $F_{2, 149} = 0.9$ ,  $p = 0.41$ ).

#### 194 *Infection load*

195 IL differed between species ( $F_{1, 163} = 15.09$ ,  $p < 0.001$ , Fig S1), *Bb* having higher loads. The  
196 selected model for *Ra* was  $IL \sim \text{Size} + \text{Region} + \text{Size} \times \text{Region}$  (Table S2a). We found a  
197 significant effect of the interaction between size and region on IL ( $F_{1, 69} = 6.5$ ,  $p = 0.013$ ).,  
198 Size at infection had a negative effect on IL in the northern region, while in the southern  
199 region size had no effect (Fig. 3a).

200 For *Bb*, the selected model was  $IL \sim \text{Bd-strain} + \text{Size} + \text{Bd-strain} \times \text{Size}$  (Table S2b). Size had  
201 a significant negative effect on infection load ( $F_{1, 87} = 64.45$ ,  $p < 0.001$ , Fig. 3b). The  
202 interaction between *Bd*-strain and size was close to significant ( $F_{1, 87} = 3.66$ ,  $p = 0.059$ ), large  
203 toadlets infected with SWE strain having somewhat higher loads than large individuals  
204 infected with UK strain.

205 *Survival*

206 All southern *Ra* survived the experiment, whereas three infected individuals from the  
207 northern region died during the experiment, resulting in survival of 92.9 % in the UK and 87.5  
208 % in the SWE treatment. Survival was complete in the control treatment and in the southern  
209 region, and these were excluded from the model. The selected model was: Survival ~ Size  
210 (Table S3a) indicating poorer survival of smaller individuals in the two infection treatments in  
211 the northern region ( $\chi^2_{1,26} = 6.49$  p= 0.011; Fig. 4a).

212 While all *Bb* in the control treatment survived the experiment, there was considerable  
213 mortality in the infection treatments. Furthermore, survival was higher in southern (66.7 % in  
214 SWE and 89.5 % in UK) than in the northern region (38.7 % in SWE and 12.9 % in UK). Due  
215 to 100% survival in the control treatment we excluded it from the full model. We also  
216 excluded the interaction term between region and size as well as region and infection load, as  
217 the range of infection load and size from the northern region only covered a small subset of  
218 the range of the southern region, and including these interactions may lead to problematic  
219 extrapolations. Survival of *Bb* in the two infection treatments was best explained by the model  
220 Survival ~ Bd-strain + Size + IL + *Bd*-strain × IL (Table S3b). Initial size had a strong  
221 positive effect on survival ( $F_{1,86} = 13.10$ , p < 0.001, Fig. 4b), whereas IL had a strong  
222 negative effect ( $F_{1,86} = 27.61$ , p < 0.001). In addition, the significant interaction between *Bd*  
223 strain and infection load ( $F_{1,86} = 7.05$ , p = 0.009) corresponded to SWE strain having a  
224 steeper slope between survival and infection load compared to UK strain. This results in  
225 higher mortality at high and lower mortality at low IL in SWE treatment (Fig. 4b).

226 *Growth*

227 Growth in *Ra* was best explained by the model Growth ~ Bd-strain + Region + Size + IL +  
228 Region × Size + Size × IL (Table S4a). IL had a negative effect on growth in both infected  
229 groups ( $F_{1,107} = 6.16$ , p = 0.015; Fig. 5a). Size at infection had a negative effect on growth

230 ( $F_{1, 107} = 6.16$ ,  $p = 0.015$ , Fig. 5b), the Size  $\times$  IL interaction ( $F_{1, 107} = 7.21$ ,  $p = 0.008$ ) was  
231 caused by the stronger of IL on growth of small individuals. We also found a significant effect  
232 of *Bd* strain on growth ( $F_{2, 107} = 3.13$ ,  $p = 0.048$ ) and an analysis using only the infected  
233 individuals showed that froglets infected with the Swedish strain had an overall lower growth  
234 than those infected with the UK strain ( $F_{1, 70} = 5.63$ ,  $p = 0.02$ ; Fig. 5b).

235 Growth analyses in *Bb* revealed strong negative effects of infection load and a size  $\times$  IL  
236 interaction when all three *Bd*-treatments were analysed together (Table S4b). To get more  
237 insight on how *Bd* strain affected *Bb* growth we analysed the in the two *Bd*- infection  
238 treatments. This best model was Growth  $\sim$  *Bd*-strain + Region + Size + IL + *Bd*-strain  $\times$   
239 Region + Region  $\times$  Size + Size  $\times$  IL (Table S4c). The effect of size depended on the region  
240 (Region  $\times$  Size :  $F_{1, 83} = 17.61$ ,  $p < 0.001$ ) and IL (Size  $\times$  IL:  $F_{1, 83} = 9.00$ ,  $p = 0.004$ ).

241 Therefore, we present the effect of size on growth separately for the less and more infected  
242 half of the individuals (Fig 6a, b). In a similar manner, how infection load affects growth is  
243 presented separately for smaller and larger half of the individuals (Fig 6c, d).

244 In small individuals, IL had strong negative effect on growth in both regions (Fig. 6a). In  
245 larger toadlets, growth of southern individuals was unaffected by IL whereas larger northern  
246 individuals were negatively affected by IL (Fig. 6b). This was also reflected on how initial  
247 mass affected growth: in southern toadlets larger individuals grew proportionally faster,  
248 whereas in northern toadlets proportional growth was negatively correlated with initial size  
249 (Fig. 6c, d). This difference was especially clear in individuals with higher IL (Fig. 6b). There  
250 was no significant difference between the two *Bd*-strains ( $F_{1, 83} = 0.06$ ,  $p = 0.812$ ) nor  
251 significant interaction (*Bd*-strain  $\times$  Region:  $F_{1, 83} = 2.20$ ,  $p = 0.142$ ).

252

253 **Discussion**

254 We found that *Bd* infection lowered survival in both *Ra* and *Bb*, but the effect of *Bd* was more  
255 severe on the latter species, especially in the northern region. Our analyses suggest that the  
256 survival differences between the regions were largely mediated by body size, smaller  
257 individuals being more sensitive to *Bd*. Furthermore, we found that *Bd* infection led to sub-  
258 lethal effects in terms of reduced growth, suggesting that individuals surviving the infection  
259 may have lower fitness mediated by their smaller body size. These results suggest that *Bd*  
260 infection may have both direct and indirect effects on amphibian populations and that high  
261 latitude populations may run a higher risk of negative effects than their low-latitude  
262 counterparts.

263 While both species became infected in our experiment, in *Ra* IL was lower and *Bd*-mediated  
264 mortality was only a fraction of the mortality experienced by *Bb*. These results agree with  
265 previous studies showing that brown frogs, such as *Ra* have higher tolerance to *Bd*, while *Bb*,  
266 like many other bufonids, is more susceptible to *Bd*-infection (Bosch & Martínez-Solano  
267 2006, Garner et al. 2011, Gahl et al. 2012, Balaz et al. 2014, Bielby et al. 2015). When  
268 comparing susceptibility to infection and *Bd*-mediated mortality between two anuran species,  
269 Bielby et al. (2015) found that *R. temporaria*, closely related to *Ra*, was resistant to infection  
270 even at high doses, while *Bb* showed near complete infection and dose-dependent mortality.  
271 Since *Ra* has higher infection prevalence in the wild (Meurling et al. 2020) and higher  
272 infection tolerance (this study), we suggest that *Ra* may act as a reservoir species and a  
273 possible vector for *Bd*-transmission to more sensitive species such as *Bb*. Indeed, Kärvemo et  
274 al. (2019) showed that *Bb* populations coexisting with *Ra* had higher *Bd*-prevalence than  
275 populations breeding in ponds without *Ra*.

276 We found a clear difference in survival between northern and southern populations especially  
277 in *Bb*. Northern individuals were smaller at the time of infection than southern individuals,  
278 and our analyses suggest that the survival difference was mainly mediated by body size. This

279 is in accordance with previous studies (Bradley et al. 2015, Burrow et al. 2017) showing that  
280 smaller individuals were more vulnerable to *Bd* infection. Smaller individuals may have less  
281 developed immune system which may render them more vulnerable to disease (Møller et al.  
282 1998, Burrow et al. 2017). Smaller individuals may also be more vulnerable to *Bd*-mediated  
283 water loss as they have larger surface area to body mass ratio. Increased water loss via  
284 sloughing is an important symptom in chytridiomycosis, which may render smaller  
285 individuals more sensitive to *Bd* infection (Russo et al. 2018, Wu et al. 2019).

286 Our results suggest that much of the differences in *Bd*-mediated mortality can be explained by  
287 size differences between the regions. As we raised the tadpoles under common garden  
288 conditions, the differences in body mass most likely have a genetic origin. Two additional, not  
289 mutually exclusive, explanations may further explain higher mortality in the northern  
290 populations. Firstly, northern populations may have less effective immune systems because of  
291 reduced genetic variation due to postglacial colonization processes (Hewitt 2000, see  
292 Cortazar-Chinarro et al. 2017, Rödin-Mörch et al. 2019 for *Ra*, Thörn et al. 2021 for *Bb*), or  
293 lower pathogen abundance at higher latitudes (Schemske et al. 2009). This hypothesis gains  
294 support from the fact that MHC variation in both our study species is lower at higher latitudes  
295 (Cortázar-Chinarro et al. 2017, Meurling 2019). Moreover, *Bd*-mediated survival in *Bb* seems  
296 to be linked with certain MHC alleles (Meurling 2019), as also found in other species (Savage  
297 & Zamudio 2011, Savage et al. 2018, Kosch et al. 2019). Secondly, higher larval development  
298 rates in the northern populations may trade off with disease resistance (Johnson et al. 2011,  
299 Woodhams et al. 2016). Also this hypothesis is indirectly supported by the facts that more  
300 time-constrained populations have higher development rates in both our study species (Luquet  
301 et al. 2015, 2019) and that *Ra* tadpoles experimentally induced to develop faster have weaker  
302 immune response (Murillo-Rincon et al. 2017). Additional studies focusing on *Bd* resistance  
303 in known MHC and developmental genotypes would be highly interesting.

304 *Bd* infection had clear negative effects on growth in both species. As body size is positively  
305 related to fitness in juvenile amphibians (Earl and Whiteman 2015), these results suggest that  
306 *Bd* may have sublethal fitness effects. For example, hibernation success is often positively  
307 related to body size and failing to reach a sufficient size before hibernation can greatly reduce  
308 overwinter survival (Altwegg and Reyer 2003). This can be especially detrimental at higher  
309 latitudes where the hibernation period can reach eight months. Small body size may also lead  
310 to higher risk of predation, delayed maturation and lower ability to compete for resources and  
311 mates (reviewed in Earl and Whiteman 2015). In the long run, these effects may decrease  
312 population growth rate and ability to cope with environmental changes such as higher  
313 temperature due to climate change. In our case, even if survival of *Ra* was not strongly  
314 affected by *Bd* infection, the results suggest that sublethal effects of infection mediated by  
315 body size may still lower individual and population fitness.

316 We found relatively little evidence for differences in pathogenicity between the two *Bd*  
317 isolates. However, we found significant treatment  $\times$  size interaction in survival of *Bb* where  
318 survival was more strongly size-dependent when toadlets were infected with the UK strain.  
319 These results suggest that individuals infected with the UK strain may relatively quickly reach  
320 a size where the lethality of *Bd* is reduced, while *Bd*-mediated mortality induced by the  
321 Swedish strain is less size-dependent. This is especially the case in southern individuals which  
322 are larger at metamorphosis, while the smaller northern individuals stay longer in the  
323 vulnerable size classes.

324 A potential caveat in our study is that as we used laboratory-raised (but wild-collected)  
325 individuals which may not have developed as diverse community of skin microbiota as wild  
326 individuals. Indeed, captive amphibians often have a reduced and less varied bacterial  
327 community than wild populations of the same species (Antwis et al. 2014, Bataille et al.  
328 2016). As skin microbiome plays an important role in defending against fungal and other

329 pathogens, this could impact the ability of amphibians reared in captivity to respond to *Bd*  
330 infection (Harris et al. 2009, Walke et al. 2015, Madison et al. 2017, Woodhams et al. 2018).  
331 We currently lack knowledge on the skin microbiomes of our study species and if these differ  
332 between geographical regions. Microbiome studies are needed for additional insight on  
333 factors behind the high mortality found in this study.

334 *Bd* is widespread in the southern parts of Sweden (Kärverno et al. 2018, 2019, Meurling et al.  
335 2020). However, in a pattern similar to much of Europe (Lips 2016, Scheele et al. 2019), no  
336 cases of chytridiomycosis or unusual die-offs have been found in Sweden. Our experimental  
337 results suggest that even though no negative effects of the infection have been seen in the  
338 wild, this might not be the complete picture. It is currently unclear how well the present  
339 results translate to natural conditions, but we note that *Bd* causes sublethal effects in terms of  
340 reduced movements and body condition in wild Scandinavian amphibians (Kärverno et al.  
341 2019, 2020). Furthermore, the lethality of *Bd* is highly dependent on environmental  
342 conditions, including temperature (e.g., Novakowski et al. 2106, Mosher et al. 2018, Cohen et  
343 al. 2019), and relatively minor elevations in mortality may risk long-term survival of *Bd*-  
344 infected amphibian populations (Muths et al. 2011; Spitzen-van der Sluijs et al. 2017). Two  
345 important conclusions can be drawn. Firstly, very few surveys have been conducted in  
346 northern Scandinavia (Meurling et al. 2020). As populations at higher latitudes can be more  
347 vulnerable to infection, it is important to investigate the occurrence of *Bd* in these areas and, if  
348 still possible, prevent or limit the northward spread of the fungus. Secondly, we showed that  
349 infection leads to higher mortality and reduced body size. These, in turn, can lead to reduced  
350 population growth rates in the long-term even in the absence of major mortality effects. As  
351 the potential negative effects of *Bd* on population growth can be relatively subtle and difficult  
352 to detect (Doddington et al. 2013, Spitzen-van der Sluijs et al. 2017, Mosher et al. 2018),  
353 long-term monitoring of amphibian populations is of high importance.

354

355 **Acknowledgements**

356 We thank Lola Brooks and Trent Garner for discussions and providing the *Bd*-strains.

357

358 **Declarations**

359 **Funding:** Funding from the Swedish Research Council Formas (215-2014-294), Stiftelsen

360 Oscar och Lili Lamms Minne and Stiftelsen för zoologisk forskning is acknowledged.

361 **Conflict of interest:** The authors declare no conflicts of interest.

362 **Ethics approval:** The study was conducted with a permit (C28/15) from Uppsala ethical

363 committee for animal experiments and collection permits from the county administrative

364 boards in Skåne and Norrbotten.

365 **Availability of data and materials:** The data will be deposited in DRYAD upon acceptance.

366 **Authors' contributions:** SM, MCC, JH and AL conceived and designed the experiments,

367 SM, MCC and DÅ performed the experiments and EÅ provided advice and logistic help, SM

368 and MLS analysed the data, SM and AL wrote the paper with input from all the authors.

369

370 **References**

371 Altwegg R, Reyer HU (2003) Patterns of natural selection on size at metamorphosis in water  
372 frogs. *Evolution* 57:872-882

373 Antwis RE, Haworth RL, Engelmoer DJ et al.(2014) Ex situ diet influences the bacterial  
374 community associated with the skin of red-eyed tree frogs (*Agalychnis callidryas*).  
375 *PLoS One* 9:e85563

376 APHA. 1985. Standard methods for the examination of water and wastewater. 16th ed.  
377 American Public Health Association, Washington, DC.



- 378 Balaz V, Voros J, Civis P et al. (2014) Assessing risk and guidance on monitoring of  
379 *Batrachochytrium dendrobatidis* in Europe through identification of taxonomic  
380 selectivity of infection. *Conserv Biol* 28:213-223
- 381 Bataille A, Fong JJ, Cha M et al. (2013) Genetic evidence for a high diversity and wide  
382 distribution of endemic strains of the pathogenic chytrid fungus *Batrachochytrium*  
383 *dendrobatidis* in wild Asian amphibians. *Mol Ecol* 22:4196-4209.
- 384 Bataille A, Lee-Cruz L, Tripathi B et al. (2016) Microbiome variation across amphibian skin  
385 regions: Implications for chytridiomycosis mitigation efforts. *Microb Ecol* 71:221-232
- 386 Berger L, Speare R, Daszak P et al. (1998) Chytridiomycosis causes amphibian mortality  
387 associated with population declines in the rain forests of Australia and Central  
388 America. *Proc Natl Acad Sci USA* 95:9031-9036
- 389 Becker CG, Bletz MC, Greenspan SE et al. (2019) Low-load pathogen spillover predicts  
390 shifts in skin microbiome and survival of a terrestrial-breeding amphibian. *Proc R Soc*  
391 *B* 286:20191114
- 392 Bielby J, Fisher MC, Clare FC et al. (2015) Host species vary in infection probability, sub-  
393 lethal effects, and costs of immune response when exposed to an amphibian parasite.  
394 *Sci Rep* 5:10828
- 395 Bosch J, Martínez-Solano I (2006) Chytrid fungus infection related to unusual mortalities of  
396 *Salamandra salamandra* and *Bufo bufo* in the Peñalara Natural Park, Spain. *Oryx*  
397 40:84-89
- 398 Boyle DG, Boyle DB, Olsen V et al. (2004) Rapid quantitative detection of chytridiomycosis  
399 (*Batrachochytrium dendrobatidis*) in amphibian samples using real-time Taqman PCR  
400 assay. *Dis Aquat Org* 60:141-148
- 401 Bradley PW, Gervasi SS, Hua J et al. (2015) Differences in sensitivity to the fungal pathogen  
402 *Batrachochytrium dendrobatidis* among amphibian populations. *Conserv Biol* 29:134-  
403 1356
- 404 Burrow AK, Rumschlag SL, Boone MD (2017) Host size influences the effects of four  
405 isolates of an amphibian chytrid fungus. *Ecol Evol* 7:9196-9202
- 406 Casadevall A (2007) Determinants of virulence in the pathogenic fungi. *Fungal Biol Rev*  
407 21:130-132
- 408 Campbell L, Bower DS, Clulow S et al. (2019) Interaction between temperature and sublethal  
409 infection with the amphibian chytrid fungus impacts a susceptible frog species. *Sci*  
410 *Rep* 9:83

- 411 Cohen JM, McMahon TA, Ramsay C et al. (2019) Impacts of thermal mismatches on chytrid  
412 fungus *Batrachochytrium dendrobatidis* prevalence are moderated by life stage, body  
413 size, elevation and latitude. *Ecol Lett* 22:817-825
- 414 Cortázar-Chinarro M, Lattenkamp EZ, Meyer-Lucht Y et al. (2017) Drift, selection, or  
415 migration? Processes affecting genetic differentiation and variation along a latitudinal  
416 gradient in an amphibian. *BMC Evol Biol* 17:189
- 417 Dang TD, Searle CL, Blaustein AR (2017) Virulence variation among strains of the emerging  
418 infectious fungus *Batrachochytrium dendrobatidis* in multiple amphibian host species.  
419 *Dis Aquat Org* 124:233-239
- 420 Daszak P, Cunningham AA, Hyatt AD (2000) Emerging infectious diseases of wildlife--  
421 Threats to biodiversity and human health. *Science* 287:443-449
- 422 Doddington BJ, Bosch J, Oliver JA et al. (2013) Context-dependent amphibian host  
423 population response to an invading pathogen. *Ecology* 94:1795-1804
- 424 Earl JE, Whiteman HH (2015) Are commonly used fitness predictors accurate? A meta-  
425 analysis of amphibian size and age at metamorphosis. *Copeia* 103:297-309
- 426 Ebert D (2008) Host-parasite coevolution. insights from the *Daphnia*-parasite model system.  
427 *Curr Opin Microbiol* 11:290-301
- 428 Ellison AR, Tunstall T, DiRenzo GV et al. (2014) More than skin deep: functional genomic  
429 basis for resistance to amphibian chytridiomycosis. *Genome Biol Evol* 7:286-298
- 430 Farrer RA, Weinert LA, Bielby J et al. (2011) Multiple emergences of genetically diverse  
431 amphibian-infecting chytrids include a globalized hypervirulent recombinant lineage.  
432 *Proc Natl Acad Sci USA* 108:18732-18736
- 433 Fisher MC, Garner TW, Walker SF (2009) Global emergence of *Batrachochytrium*  
434 *dendrobatidis* and amphibian chytridiomycosis in space, time, and host. *Annu Rev*  
435 *Microbiol* 63:291-310
- 436 Fisher MC, Henk DA, Briggs CJ et al. (2012) Emerging fungal threats to animal, plant and  
437 ecosystem health. *Nature* 484:186
- 438 Gahl MK, Longcore JE, Houlahan JE (2012) Varying responses of northeastern North  
439 American amphibians to the chytrid pathogen *Batrachochytrium dendrobatidis*.  
440 *Conserv Biol* 26:135-141
- 441 Garner TWJ, Rowcliffe JM, Fisher MC (2011) Climate change, chytridiomycosis or  
442 condition: an experimental test of amphibian survival. *Glob Change Biol* 17:667-675
- 443 Gervasi S, Foufopoulos J (2007) Costs of plasticity: Responses to desiccation decrease post-  
444 metamorphic immune function in a pond-breeding amphibian. *Funct Ecol* 22:100-108

- 445 Gosner KL (1960) A Simplified table for staging anuran embryos and larvae with notes on  
446 identification. *Herpetologica* 16:183-190
- 447 Greenspan SE, Lambertini C, Carvalho T et al. (2018) Hybrids of amphibian chytrid show high  
448 virulence in native hosts. *Sci Rep* 8:9600
- 449 Rowley-Harris RN, Brucker RM, Walke JB et al. (2009) Skin microbes on frogs prevent  
450 morbidity and mortality caused by a lethal skin fungus. *ISME J* 3:818-824
- 451 Herczeg D, Ujszegi J, Kasler A et al. 2021. Host-multiparasite interactions in amphibians: a  
452 review. *Parasit Vectors* 14:296
- 453 Hewitt G (2000) The genetic legacy of the Quaternary ice ages. *Nature* 405:907-913
- 454 Hyatt AD, Boyle DG, Olsen V et al. (2007) Diagnostic assays and sampling protocols for the  
455 detection of *Batrachochytrium dendrobatidis*. *Dis Aquat Org* 73:175-192
- 456 Johnson PTJ, Kellermanns E, Bowerman J (2011) Critical windows of disease risk:  
457 amphibian pathology driven by developmental changes in host resistance and  
458 tolerance. *Funct Ecol* 25:726-734
- 459 Kärvemo S, Laurila A, Höglund J (2019) Urban environment and reservoir host species are  
460 associated with *Batrachochytrium dendrobatidis* infection prevalence in the common  
461 toad. *Dis Aquat Org* 134:33-42
- 462 Kärvemo S, Meurling S, Berger D et al. (2018) Effects of host species and environmental  
463 factors on the prevalence of *Batrachochytrium dendrobatidis* in northern Europe.  
464 *PLoS ONE* 13:e0199852
- 465 Kärvemo S, Wikström G, Widenfalk LA et al. (2020) Chytrid fungus dynamics and infections  
466 associated with movement distances in a red-listed amphibian. *J Zool* 311:164-174
- 467 Kosch TA, Silva CNS, Brannelly LA et al. (2019) Genetic potential for disease resistance in  
468 critically endangered amphibians decimated by chytridiomycosis. *Anim Conserv*  
469 22:238-250
- 470 Laine A-L, Burdon JJ, Dodds PN et al. (2011) Spatial variation in disease resistance: from  
471 molecules to metapopulations. *J Ecol* 99:96-112.
- 472 Lips KR (2016) Overview of chytrid emergence and impacts on amphibians. *Phil Trans R Soc*  
473 B 371:20150465
- 474 Lorch JM, Knowles S, Lankton JS et al. (2016) Snake fungal disease: an emerging threat to  
475 wild snakes. *Phil Trans R Soc B* 371:20150457
- 476 Luquet E, Léna JP, Miaud C et al. (2015) Phenotypic divergence of the common toad (*Bufo*  
477 *bufo*) along an altitudinal gradient: evidence for local adaptation. *Heredity* 114:69-79

- 478 Luquet E, Rödin Mörch P, Cortázar-Chinarro M et al. (2019) Post-glacial colonization routes  
479 coincide with a life-history breakpoint along a latitudinal gradient. *J Evol Biol* 32:356-  
480 368
- 481 Martin-Torrijos L, Campos Llach M, Pou\_Rovira Q et al. (2017) Resistance to crayfish  
482 plague, *Aphanomyces astaci* (Oomycota) in the endangered freshwater crayfish  
483 species *Austropotamobius pallipes*. *PLoS ONE* 12:e0181226
- 484 Madison JD, Berg EA, Abarca JG et al. (2017) Characterization of *Batrachochytrium*  
485 *dendrobatidis* inhibiting bacteria from amphibian populations in Costa Rica. *Front*  
486 *Microbiol* 8:290
- 487 Meurling S (2019) The response in native wildlife to an invading pathogen: Swedish  
488 amphibians and *Batrachochytrium dendrobatidis*. PhD thesis, Uppsala University.
- 489 Meurling S, Kärvemo S, Chondrelli N et al. (2020) Occurrence of *Batrachochytrium*  
490 *dendrobatidis* in Sweden: higher infection prevalence in southern species. *Dis Aquat*  
491 *Org* 140:209-218
- 492 More S, Angel Miranda M, Bicout D et al.(2018) Risk of survival, establishment and spread  
493 of *Batrachochytrium salamandrivorans* (*Bsal*) in the EU. *EFSA J* 16:e05259
- 494 Miller AP, Christe P, Erritzoe J et al. (1998). Condition, disease and immune defence. *Oikos*  
495 83:301-306
- 496 Mosher BA, Bailey LL, Muths E et al. (2018) Host-pathogen metapopulation suggest high  
497 elevation refugia for boreal toads. *Ecol Appl* 28:926-937
- 498 Murillo-Rincon AP, Laurila A, Orizaola G (2017) Compensating for delayed hatching reduces  
499 offspring immune response and increases life-history costs. *Oikos* 126:565-571
- 500 Muths E, Scherer RD, Pilliod DS (2011) Compensatory effects of recruitment and survival  
501 when amphibians are perturbed by disease. *Ecol Appl* 48:873-879
- 502 Nowakowski AJ, Whitfield SM, Eskew EA et al. (2016) Infection risk decreases with  
503 increasing mismatch in host and pathogen environmental tolerances. *Ecol Lett*  
504 19:1051-1061
- 505 O'Hanlon SJ, Rieux A, Farrer RA et al. (2018) Recent Asian origin of chytrid fungi causing  
506 global amphibian declines. *Science* 360:621-627
- 507 Olson DH, Aanensen DM, Ronnenberg KL et al. (2013) Mapping the global emergence of  
508 *Batrachochytrium dendrobatidis*, the amphibian chytrid fungus. *PLoS ONE* 8:e56802
- 509 Palo JU, O'Hara RB, Laugen AT et al. (2003) Latitudinal divergence of common frog (*Rana*  
510 *temporaria*) life history traits by natural selection: evidence from a comparison of  
511 molecular and quantitative genetic data. *Mol Ecol* 12:1963-1978

- 512 Pennisi E (2010) Armed and dangerous. *Science* 327:804-805
- 513 R Core Team (2018) R: A Language and Environment for Statistical Computing. R  
514 Foundation for Statistical Computing, Vienna, Austria
- 515 Richards-Zawacki CL (2010) Thermoregulatory behaviour affects prevalence of chytrid  
516 fungal infection in a wild population of Panamanian golden frogs. *Proc R Soc B*  
517 277:519-528
- 518 Rödin-Mörch P, Luquet E, Meyer-Lucht Yet al. (2019) Latitudinal divergence in a  
519 widespread amphibian: Contrasting patterns of neutral and adaptive genomic  
520 variation. *Mol Ecol* 28:2996-3011
- 521 Russo CJM, Ohmer MEB, Cramp RL et al. (2018) A pathogenic skin fungus and sloughing  
522 exacerbate cutaneous water loss in amphibians. *J Exp Biol* 221
- 523 Savage AE, Zamudio KR (2011) MHC genotypes associate with resistance to a frog-killing  
524 fungus. *Proc Natl Acad Sci USA* 108:16705-16710
- 525 Savage AE, Mulder KP, Torret T et al. (2018) Lost but not forgotten: MHC genotypes  
526 predict overwinter survival despite depauperate MHC diversity in a declining frog.  
527 *Conserv Genet* 19:309-322
- 528 Scheele BC, Hunter DA, Brannelly LA et al. (2017) Reservoir-host amplification of disease  
529 impact in an endangered amphibian. *Conserv Biol* 31:592-600
- 530 Scheele BC, Pasmans F, Skerratt LF et al. (2019) Amphibian fungal panzootic causes  
531 catastrophic and ongoing loss of biodiversity. *Science* 363:1459-1463
- 532 Schemske DW, Mittelbach GG, Cornell HV et al. (2009) Is there a latitudinal gradient in the  
533 importance of biotic interactions? *Annu Rev Ecol Evol Syst* 40:245-269
- 534 Sillero N, Campos J, Bonardi A et al. (2014) Updated distribution and biogeography of  
535 amphibians and reptiles of Europe. *Amph-Reptil* 35:1-31
- 536 Skerratt LF, Berger L, Speare R et al. (2007) Spread of chytridiomycosis has caused the rapid  
537 global decline and extinction of frogs. *EcoHealth* 4:125-134
- 538 Spitzen - van der Sluijs A, Canessa S, Martel A 2017 Fragile coexistence of a global chytrid  
539 pathogen with amphibian populations is mediated by environment and demography.  
540 *Proc R Soc B* 284:20171444
- 541 Thörn F, Rödin-Mörch P, Cortazar-Chinarro M et al. (2021) The effects of drift and selection  
542 on latitudinal genetic variation in Scandinavian common toads (*Bufo bufo*) following  
543 postglacial recolonization. *Heredity* 126:656-667
- 544 Voyles J, Woodhams DC, Saenz V et al. (2018) Shifts in disease dynamics in a tropical  
545 amphibian assemblage are not due to pathogen attenuation. *Science* 359:1517

- 546 Walke JB, Becker MH, Loftus SC et al. (2015) Community structure and function of  
547 amphibian skin microbes: an experiment with bullfrogs exposed to a chytrid fungus.  
548 PLoS ONE 10:e0139848
- 549 Wang SP, Liu CH, Wilson AB et al. (2017) Pathogen richness and abundance predict patterns  
550 of adaptive major histocompatibility complex variation in insular amphibians. Mol  
551 Ecol 26:4671-4685
- 552 Wibbelt G, Kurth A, Hellmann D et al. (2010) White-nose syndrome fungus (*Geomyces*  
553 *destructans*) in bats, Europe. Emerg Infect Dis 16:1237-1243
- 554 Woodhams DC, Bletz M, Kueneman J et al. (2016) Managing amphibian disease with skin  
555 microbiota. Trends Microbiol 24:161-164
- 556 Woodhams DC, LaBumbard BC, Barnhart KL et al. (2018) Prodigiosin, violacein, and  
557 volatile organic compounds produced by widespread cutaneous bacteria of amphibians  
558 can inhibit two *Batrachochytrium* fungal pathogens. Microb Ecol 75:1049-1062
- 559 Wu NC, McKercher C, Cramp RL et al. (2019) Mechanistic basis for loss of water balance in  
560 green tree frogs infected with a fungal pathogen. Am J Physiol Regul Integr Comp  
561 Physiol 317:R301-R311
- 562 Zeisset I, Beebee TJC (2014) Drift rather than selection dominates MHC Class II Allelic  
563 diversity patterns at the biogeographical range scale in natterjack toads *Bufo calamita*.  
564 PLoS ONE 9:e100176
- 565
- 566

567 **Table 1** Number of experimental and infected individuals (as determined by qPCR) in  
 568 different infection treatments.

569

| Species             | Region | Treatment    | Total Nb. | Positive | %     | Negative | %    | Failed | %    |
|---------------------|--------|--------------|-----------|----------|-------|----------|------|--------|------|
| <i>Bufo bufo</i>    | North  | Control      | 28        | 1        | 3,6   | 16       | 57,1 | 11     | 39,3 |
|                     |        | <i>BdSWE</i> | 31        | 31       | 100,0 | 0        | 0,0  | 3      | 9,7  |
|                     |        | <i>BdUK</i>  | 31        | 31       | 100,0 | 0        | 0,0  | 0      | 0,0  |
|                     | South  | Control      | 24        | 9        | 37,5  | 13       | 54,2 | 2      | 8,3  |
|                     |        | <i>BdSWE</i> | 21        | 21       | 100,0 | 0        | 0,0  | 3      | 14,3 |
|                     |        | <i>BdUK</i>  | 19        | 14       | 73,7  | 1        | 5,3  | 4      | 21,1 |
| <i>Rana arvalis</i> | North  | Control      | 16        | 1        | 6,3   | 6        | 37,5 | 9      | 56,3 |
|                     |        | <i>BdSWE</i> | 16        | 16       | 100,0 | 0        | 0,0  | 1      | 6,3  |
|                     |        | <i>BdUK</i>  | 14        | 13       | 92,9  | 0        | 0,0  | 1      | 7,1  |
|                     | South  | Control      | 25        | 2        | 8,0   | 18       | 72,0 | 5      | 20,0 |
|                     |        | <i>BdSWE</i> | 25        | 25       | 100,0 | 0        | 0,0  | 0      | 0,0  |
|                     |        | <i>BdUK</i>  | 24        | 23       | 95,8  | 1        | 4,2  | 0      | 0,0  |

570

571 **Figure legends**

572 **Fig. 1.** Map of Sweden showing the sites of egg collection. Blue and green circles show *R.*  
573 *arvalis* and green *B. bufo* sites, respectively.

574 **Fig. 2.** Mass at exposure ( $g \pm SE$ ) per region for *R. arvalis* and *B. bufo*

575 **Fig. 3.** Infection load (log<sub>10</sub> average GE, at the end of treatment) as the function of size at  
576 infection with either the Swedish or UK strain in **a.** *R. arvalis* and **b.** *B. bufo*. Lines give the  
577 predictions of the model. Filled dots and solid lines represent the northern region, while open  
578 dots and dashed lines represent the southern region.

579 **Fig. 4.** Survival as a function of size at infection with either the Swedish or UK strain for **a:** *R.*  
580 *arvalis* from the northern region. **b:** Survival in *B. bufo* as function of infection load and size  
581 at infection, where dark and pale dots represent the northern and southern regions,  
582 respectively. Line (**a**) and surfaces (**b**) give the predictions of the model. Blue dots refer to the  
583 Swedish *Bd* strain and red dots to the UK strain. In **b** some pale dots are hidden among the  
584 dark dots in the lower corner in the front (high infection load and low size).

585 **Fig. 5.** Growth per day (from infection to death or end of experiment) as a function of  
586 **a:** infection load (log<sub>10</sub> average GE, at the end of treatment) and, **b:** size (at start of  
587 treatment) in different infection treatments for *R. arvalis*. Filled and open dots represent the  
588 northern and southern regions, respectively. Lines gives the predictions of the model and are  
589 evaluated for average infection load in **a** and average size in **b**. Separate models were run for  
590 the control group and infected individuals.

591 **Fig. 6.** Growth per day as a function of **a-b:** infection load (log<sub>10</sub> average GE, at the end of  
592 treatment) and, **c-d:** size at infection with either the Swedish or UK strain or no infection  
593 (control) for *B. bufo*. Smaller individuals are represented by squares in **a** (smaller than the



594 median of their respective region) and the larger individuals as triangles in **b** (larger or equal  
595 to the median of their respective region). The same holds for **c-d** but with respect to infection  
596 load. Lines shows model prediction. Filled markers and solid lines represent the northern and  
597 open markers and dashed lines represent southern region. Separate models were run for  
598 control treated and infected individuals.

599

600 Meurling et al., Fig. 1

601

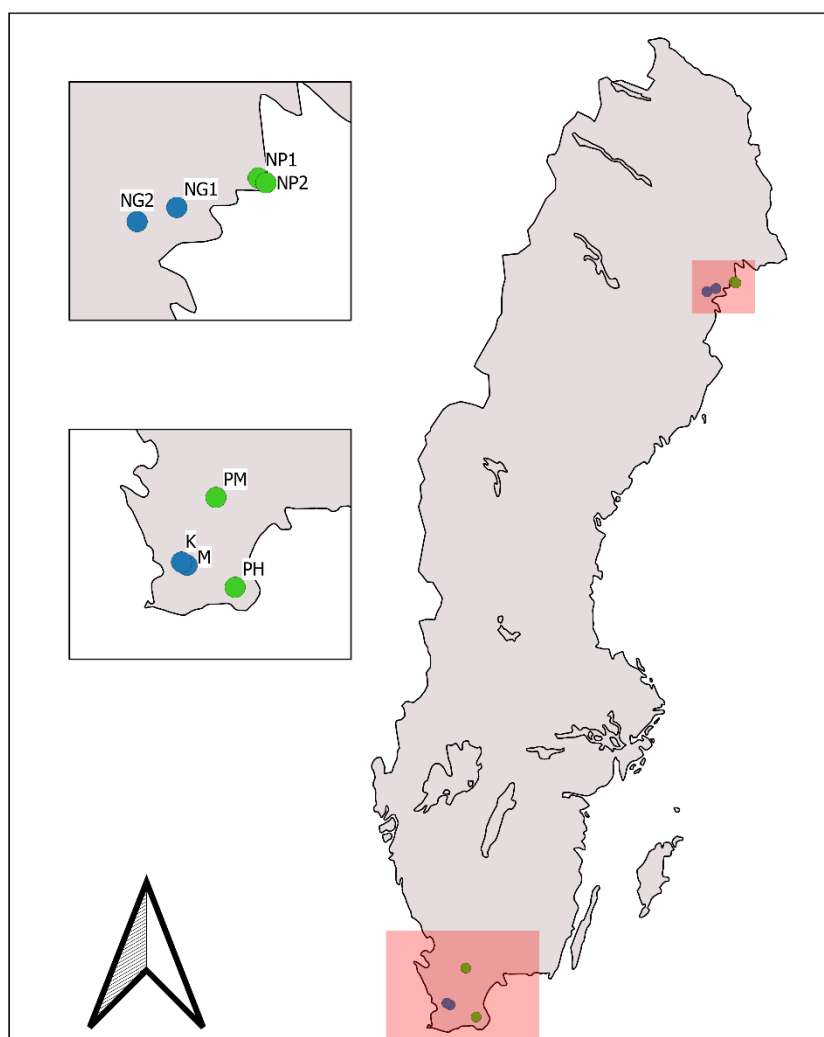

602  
603

604 Meurling et al., Fig. 2

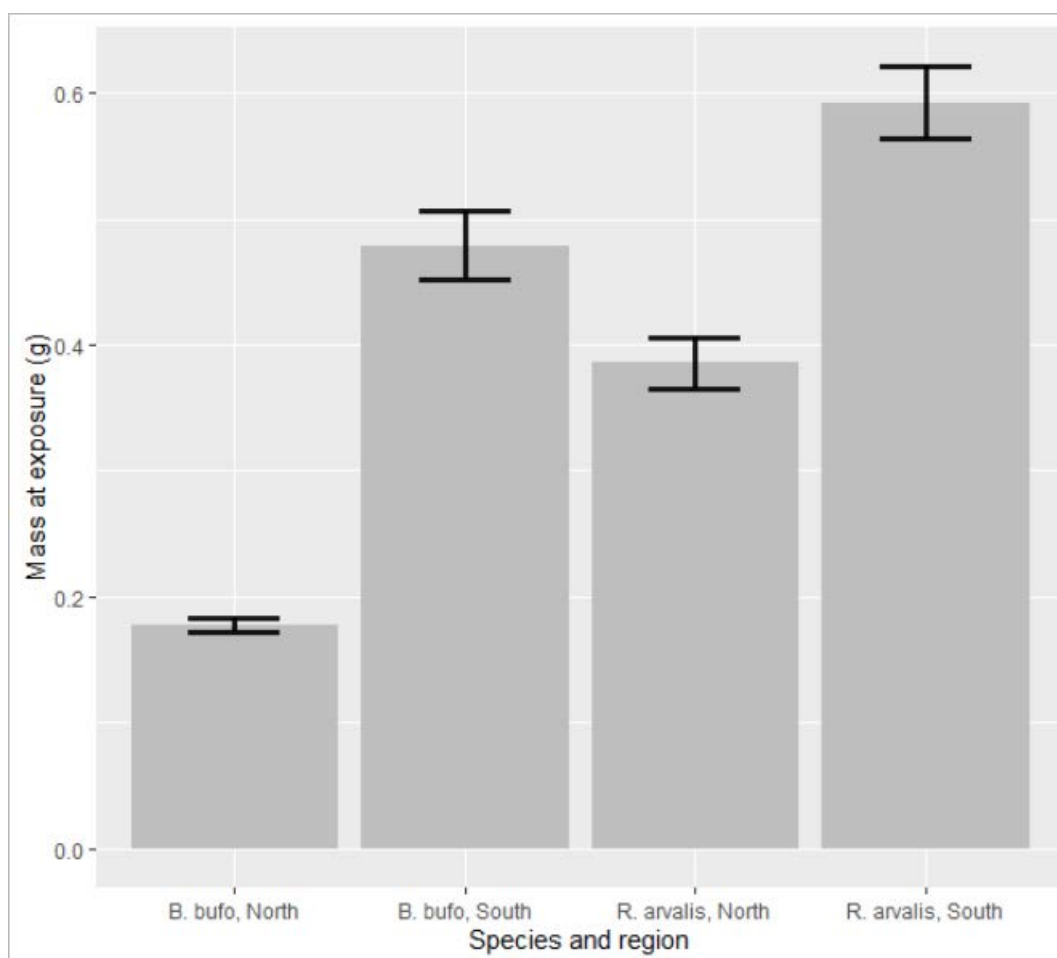

605

606

607 Meurling et al., Fig. 3

608

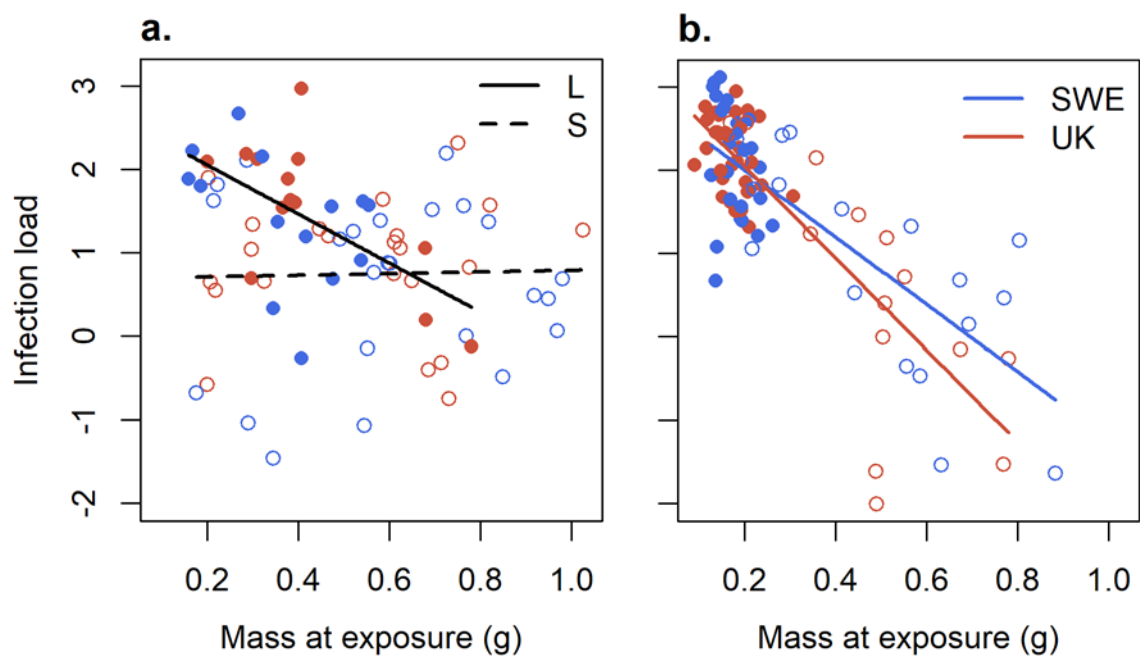

609

610

611 Meurling et al., Fig. 4

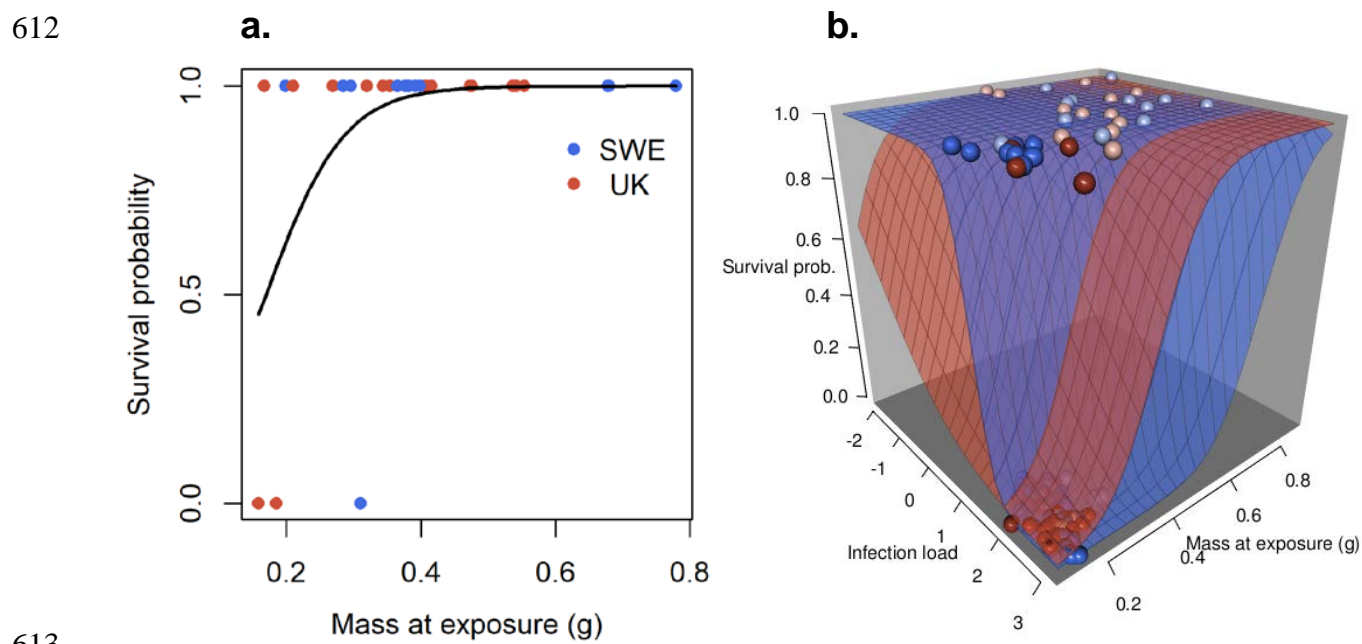

615 Meurling et al., Fig. 5

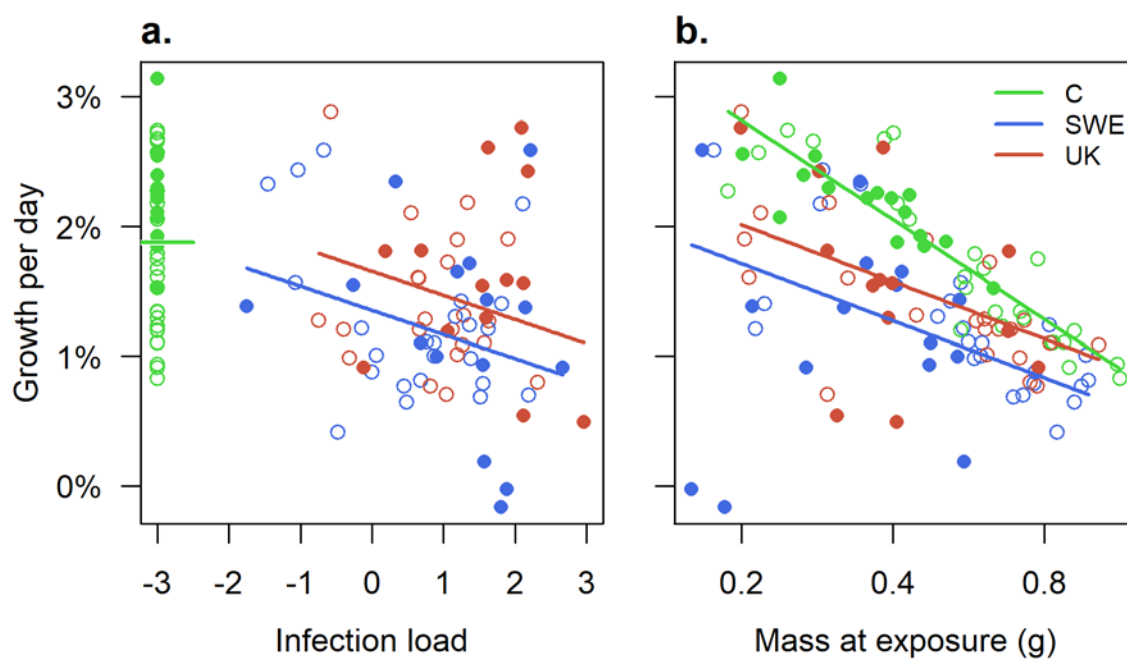

616

617

618 Meurling et al., Fig. 6

619

620

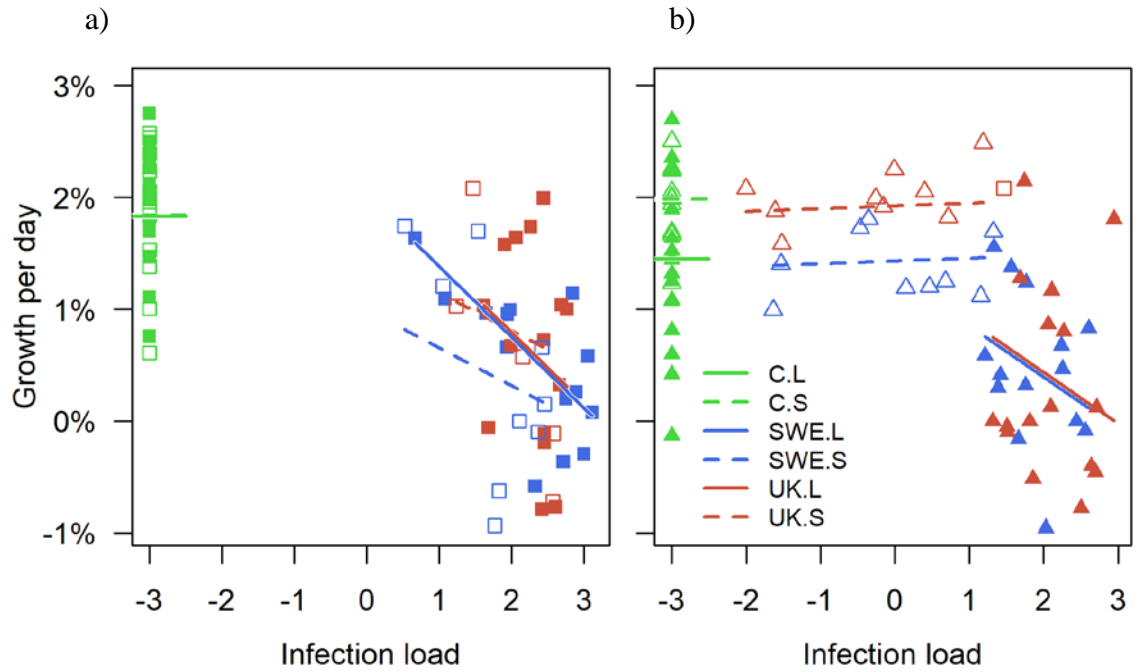

621

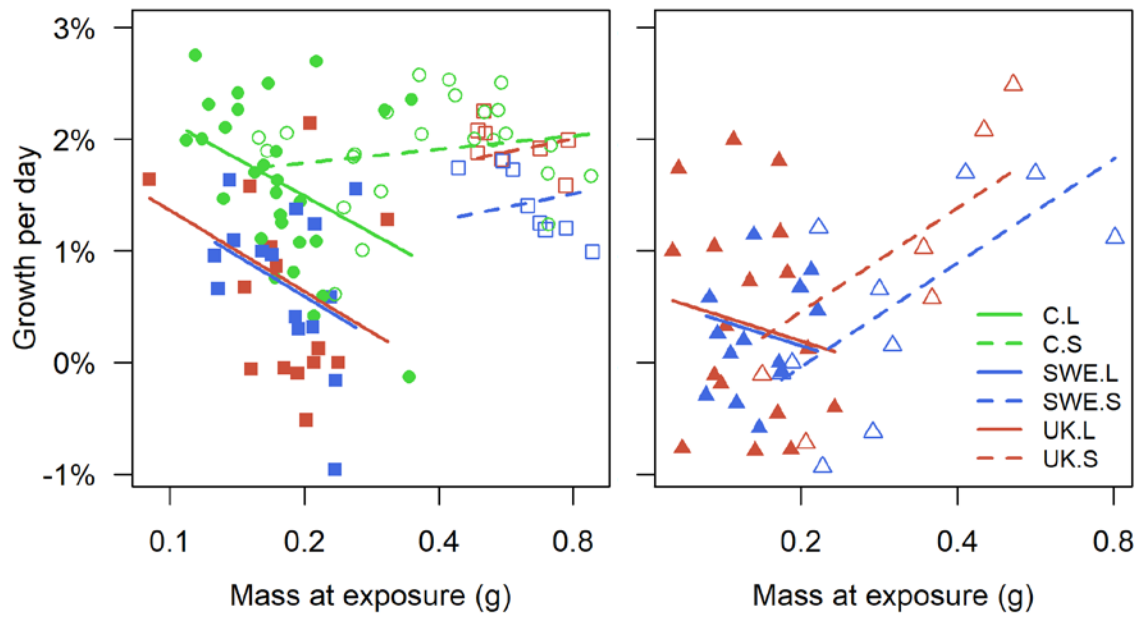

622

623

624

c)

d)

625 **Table S1.** Coordinates for the collection sites.

626

| <b>Species</b>             | <b>Region</b> | <b>Population</b> | <b>N</b>  | <b>E</b>  |
|----------------------------|---------------|-------------------|-----------|-----------|
| <b><i>Rana arvalis</i></b> | North         | NG1               | 65.519974 | 21.685978 |
|                            |               | NG2               | 65.488998 | 21.378151 |
|                            | South         | M                 | 55.699774 | 13.360416 |
|                            |               | K                 | 55.722114 | 13.284693 |
| <b><i>Bufo bufo</i></b>    | North         | NP1               | 65.583139 | 22.319458 |
|                            |               | NP2               | 65.56554  | 22.37404  |
|                            | South         | PM                | 56.217897 | 13.731548 |
|                            |               | PH                | 55.539031 | 14.009702 |

627

628

629



630 Table S2. Results from final general linear models on infection load. a) *R. arvalis*, b) *B. bufo*.

631

632 a)

|               | Sum of squares | Df | <i>F</i> | <i>P</i>          |
|---------------|----------------|----|----------|-------------------|
| Size          | 5.5            | 1  | 7.54     | <b>0.008</b>      |
| Region        | 8.8            | 1  | 12.11    | <b>&lt; 0.001</b> |
| Size x Region | 4.7            | 1  | 6.50     | <b>0.013</b>      |
| Residuals     | 50.3           | 69 |          |                   |

633

634 b)

|               | Sum of squares | Df | <i>F</i> | <i>P</i>          |
|---------------|----------------|----|----------|-------------------|
| Bd-strain     | 0.8            | 1  | 1.70     | 0.196             |
| Size          | 31.9           | 1  | 64.45    | <b>&lt; 0.001</b> |
| Strain x Size | 1.8            | 1  | 3.66     | 0.059             |
| Residuals     | 43.0           | 87 |          |                   |

635

636 Table S3. Results from final generalized linear models on survival. a) *R. arvalis*: the analyses  
637 only cover the northern population and the two *Bd*-treatments as survival in the southern  
638 population and control treatment were complete in this species. b) *B. bufo*: only the two *Bd*-  
639 treatments are included as survival was complete in the control treatment in this species.

640

641 a)

|           | LR chisquared | Df | <i>P</i>     |
|-----------|---------------|----|--------------|
| Size      | 6.5           | 1  | <b>0.011</b> |
| Residuals | 12.6          | 26 |              |

642

643 b)

|                     | Sum of squares | Df | <i>F</i> | <i>P</i>       |
|---------------------|----------------|----|----------|----------------|
| Bd-strain           | 0.2            | 1  | 0.24     | 0.624          |
| Size                | 9.3            | 1  | 13.10    | < <b>0.001</b> |
| Infection load (IL) | 19.7           | 1  | 27.61    | < <b>0.001</b> |
| Strain x IL         | 5.0            | 1  | 7.05     | <b>0.009</b>   |
| Error               | 61.3           | 86 |          |                |

644

645

646 Table S4. Results from general linear models on growth. a) *R. arvalis*, b) *B. bufo* all  
 647 individuals, c) *B. bufo*, *Bd*-infected individuals only

648  
 649 a)

|                     | Sum of squares | Df  | <i>F</i> | <i>P</i>     |
|---------------------|----------------|-----|----------|--------------|
| <i>Bd</i> strain    | 0.000131       | 2   | 3.13     | <b>0.048</b> |
| Region              | 0.000001       | 1   | 0.05     | 0.827        |
| Size                | 0.000143       | 1   | 6.84     | <b>0.010</b> |
| Infection load (IL) | 0.000129       | 1   | 6.16     | <b>0.015</b> |
| Region x Size       | 0.000053       | 1   | 2.54     | 0.114        |
| Size x IL           | 0.000150       | 1   | 7.21     | <b>0.008</b> |
| Residuals           | 0.0002233      | 107 |          |              |

650

651 b)

|                     | Sum of squares | Df  | <i>F</i> | <i>P</i>          |
|---------------------|----------------|-----|----------|-------------------|
| <i>Bd</i> -strain   | 0.000209       | 2   | 2.43     | 0.092             |
| Region              | 0.000117       | 1   | 2.72     | 0.101             |
| Size                | 0.000006       | 1   | 0.14     | 0.712             |
| Infection load (IL) | 0.000336       | 1   | 7.82     | <b>0.006</b>      |
| Strain x Size       | 0.000252       | 2   | 2.94     | 0.056             |
| Region x Size       | 0.000937       | 1   | 3.06     | 0.083             |
| Region x IL         | 0.000131       | 1   | 3.66     | 0.059             |
| Size x IL           | 0.000391       | 1   | 21.84    | <b>&lt; 0.001</b> |
| Residuals           | 0.005667       | 132 |          |                   |

652

653 c)

|                     | Sum of squares | Df | <i>F</i> | <i>P</i>          |
|---------------------|----------------|----|----------|-------------------|
| <i>Bd</i> -strain   | 0.000003       | 1  | 0.06     | 0.812             |
| Region              | 0.000001       | 1  | 0.02     | 0.877             |
| Size                | 0.000494       | 1  | 10.67    | <b>0.002</b>      |
| Infection load (IL) | 0.000513       | 1  | 11.09    | <b>0.001</b>      |
| Strain x Region     | 0.000102       | 1  | 2.20     | 0.142             |
| Region x Size       | 0.000814       | 1  | 17.61    | <b>&lt; 0.001</b> |
| Size x IL           | 0.000416       | 1  | 9.00     | <b>0.004</b>      |
| Residuals           | 0.003838       | 83 |          |                   |

654

655

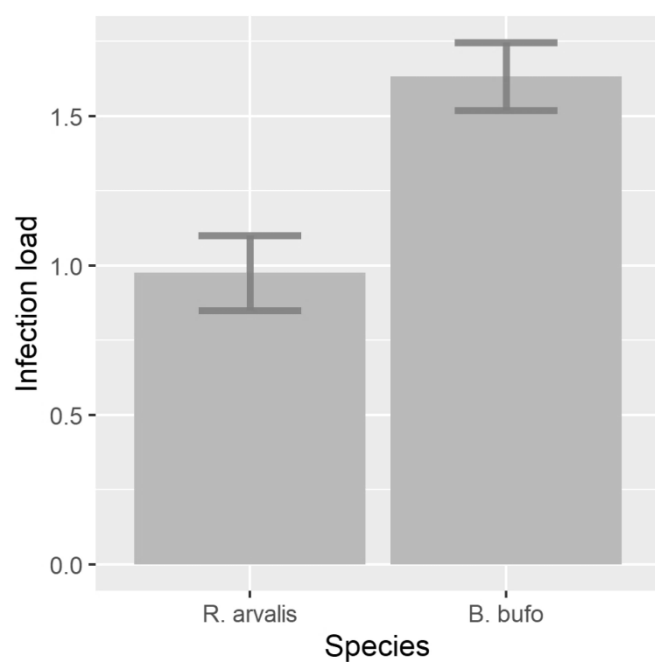

656

657 **Fig. S1.** Infection load (genomic equivalents) in *R.arvalis* and *B.bufo*.

658
